# Supplementary material for: Gypenoside XVII Prevents Atherosclerosis by Attenuating Endothelial Apoptosis and Oxidative Stress: Insight into the ERα-Mediated PI3K/Akt Pathway
Source: Int J Mol Sci. 2017 Feb 9;18(2):77. doi: 10.3390/ijms18020077 (PMC5343768; doi:10.3390/ijms18020077)
Supplement: Supplementary file 1 [file ijms-18-00077-s001.pdf]

# Supplementary Materials: Gypenoside XVII Prevents Atherosclerosis by Attenuating Endothelial Apoptosis and Oxidative Stress: Insight into the ERα-Mediated PI3K/Akt Pathway

Ke Yang, Haijing Zhang, Yun Luo, Jingyi Zhang, Min Wang, Ping Liao, Li Cao, Peng Guo, Guibo Sun and Xiaobo Sun

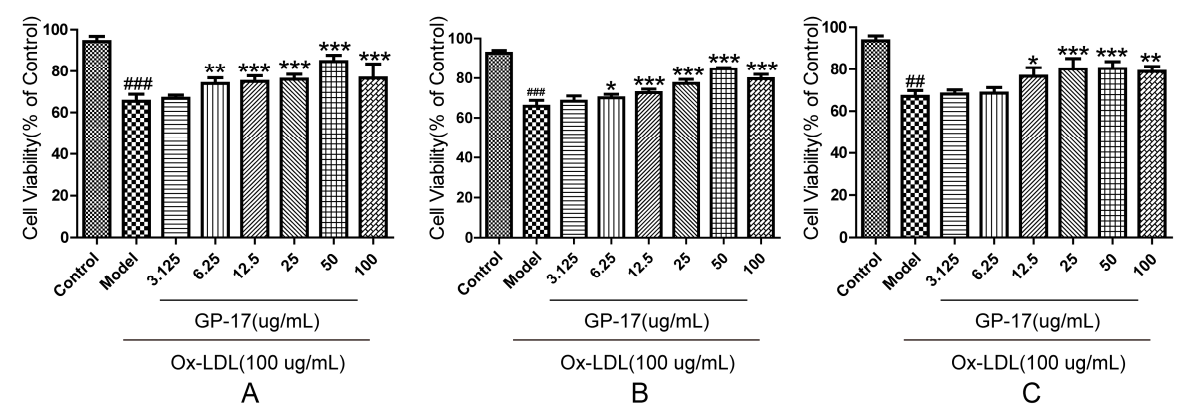

**Figure S1.** Cytoprotective effects for GP-17 on Ox-LDL-induced cytotoxicity in HUVECs. (A) Incubation with GP-17 for 4 h significantly lowered Ox-LDL-induced cell injury. Cell viability was measured by MTT assay; (B) Incubation with GP-17 for 8 h significantly lowered Ox-LDL-induced cell injury. Cell viability was measured by MTT assay; (C) Incubation with GP-17 for 24 h significantly lowered Ox-LDL-induced cell injury. Cell viability was measured by MTT assay. The values are expressed as the mean  $\pm$  S.E.M. from three independent experiments. ##  $p < 0.01$ ; ###  $p < 0.001$  vs. Control; \*  $p < 0.05$ ; \*\*  $p < 0.01$ ; \*\*\*  $p < 0.001$  vs. Model.

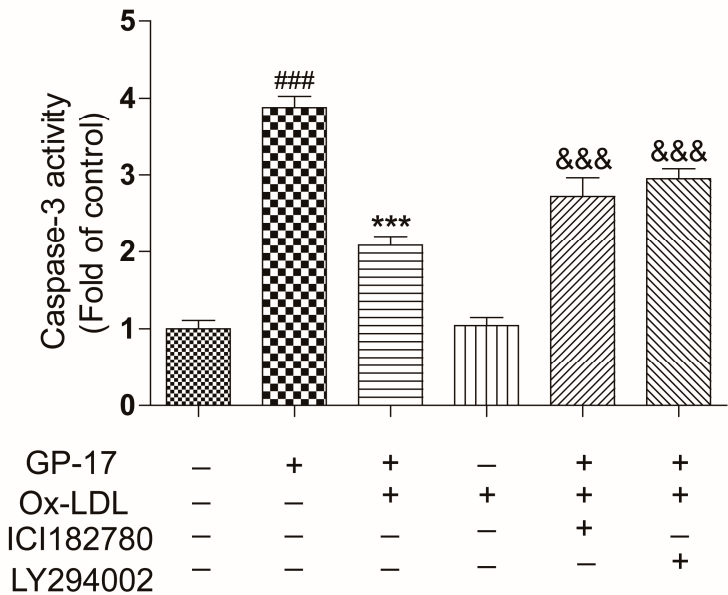

**Figure S2.** GP-17 protected HUVECs against Ox-LDL-induced apoptosis by decreasing caspase3 activity. Caspase3 activity mediated by GP-17 in Ox-LDL-induced HUVECs was abolished by pretreatment with ICI182780 or LY294002. ###  $p < 0.001$  vs. Control; \*\*\*  $p < 0.001$  vs. Ox-LDL; &&&  $p < 0.001$  vs. GP-17 + Ox-LDL.

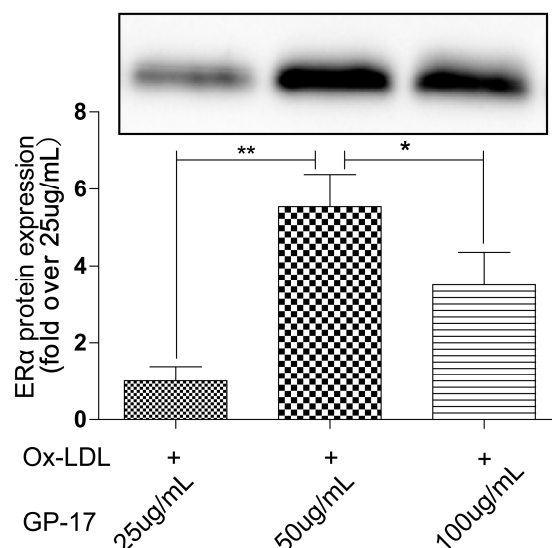

**Figure S3.** GP-17 had a dose-dependent on the expression of ERα in Ox-LDL treated HUVEC. ERα was mediated by pretreatment with different concentration of GP-17 in Ox-LDL-induced HUVECs. \*  $p < 0.05$ ; \*\*  $p < 0.01$  vs. pretreatment with 50  $\mu\text{g/mL}$  GP-17.

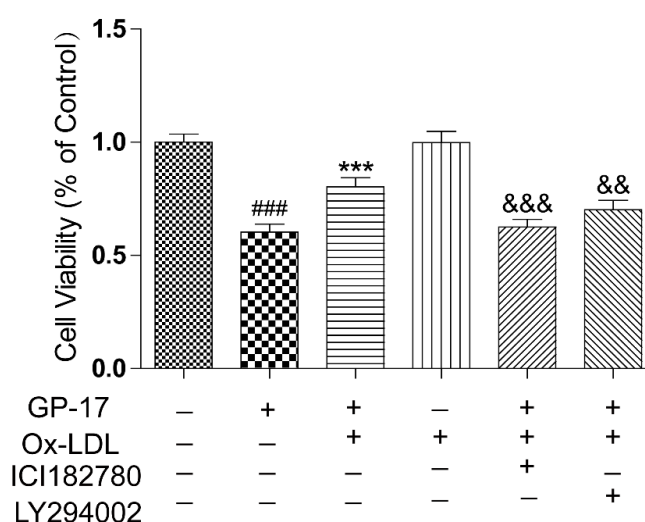

**Figure S4.** The activity of inhibitor analysis for ICI182780 and LY294002. Cytoprotective effect of GP-17 against Ox-LDL-induced cell viability reduction was inhibited by pretreatment with ICI-182,780 or LY294002. Cell viability was measured by MTT assay. ###  $p < 0.001$  vs. Control; \*\*\*  $p < 0.001$  vs. Ox-LDL; &&  $p < 0.01$ ; &&&  $p < 0.001$  vs. GP-17 + Ox-LDL.
